# Supplementary material
Source: PubMed Central journal article supplement (PMC6531328)

## Supplemental Digital Content

### Supplemental Digital Content S1. Figure

Study flow diagram. NRN = *Eunice Kennedy Shriver* National Institute of Child Health and Human Development Neonatal Research Network; NEC = necrotizing enterocolitis; SIP = spontaneous intestinal perforation.

### Supplemental Digital Content S2. Figure

Percentage of infants receiving prolonged early antibiotic therapy over time.

## Supplemental Digital Content S1. Figure

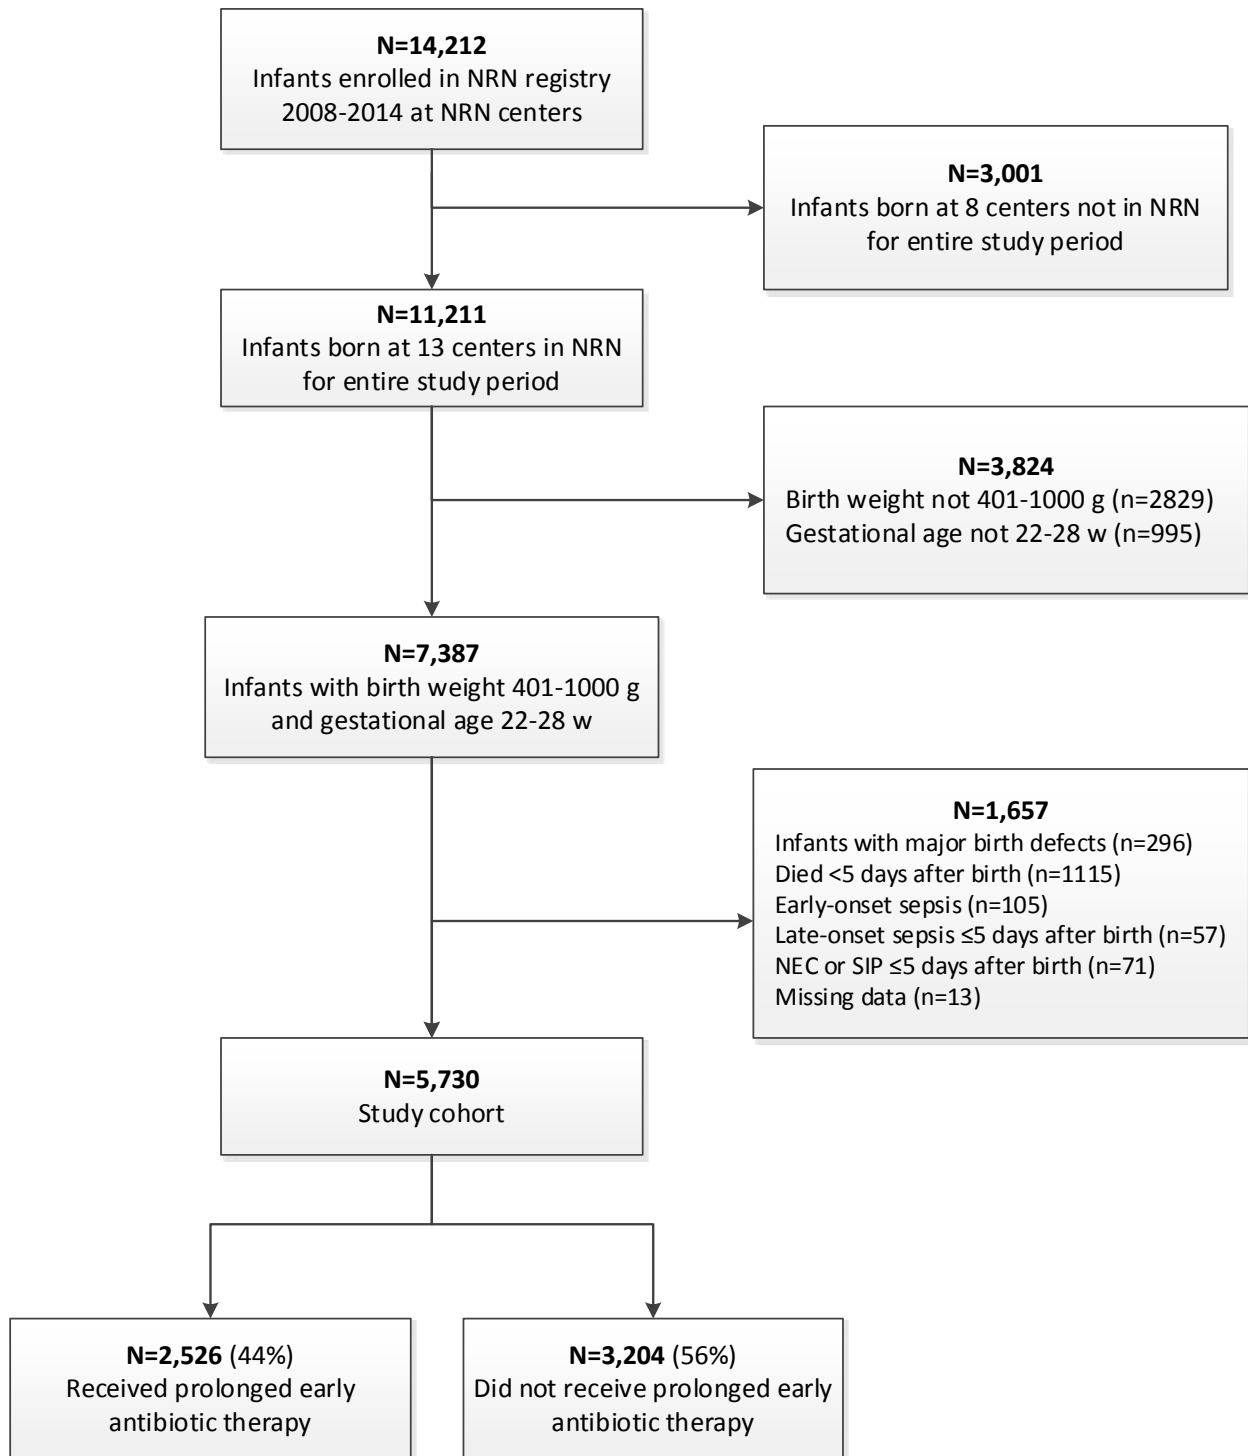

Supplemental Digital Content S2. Figure

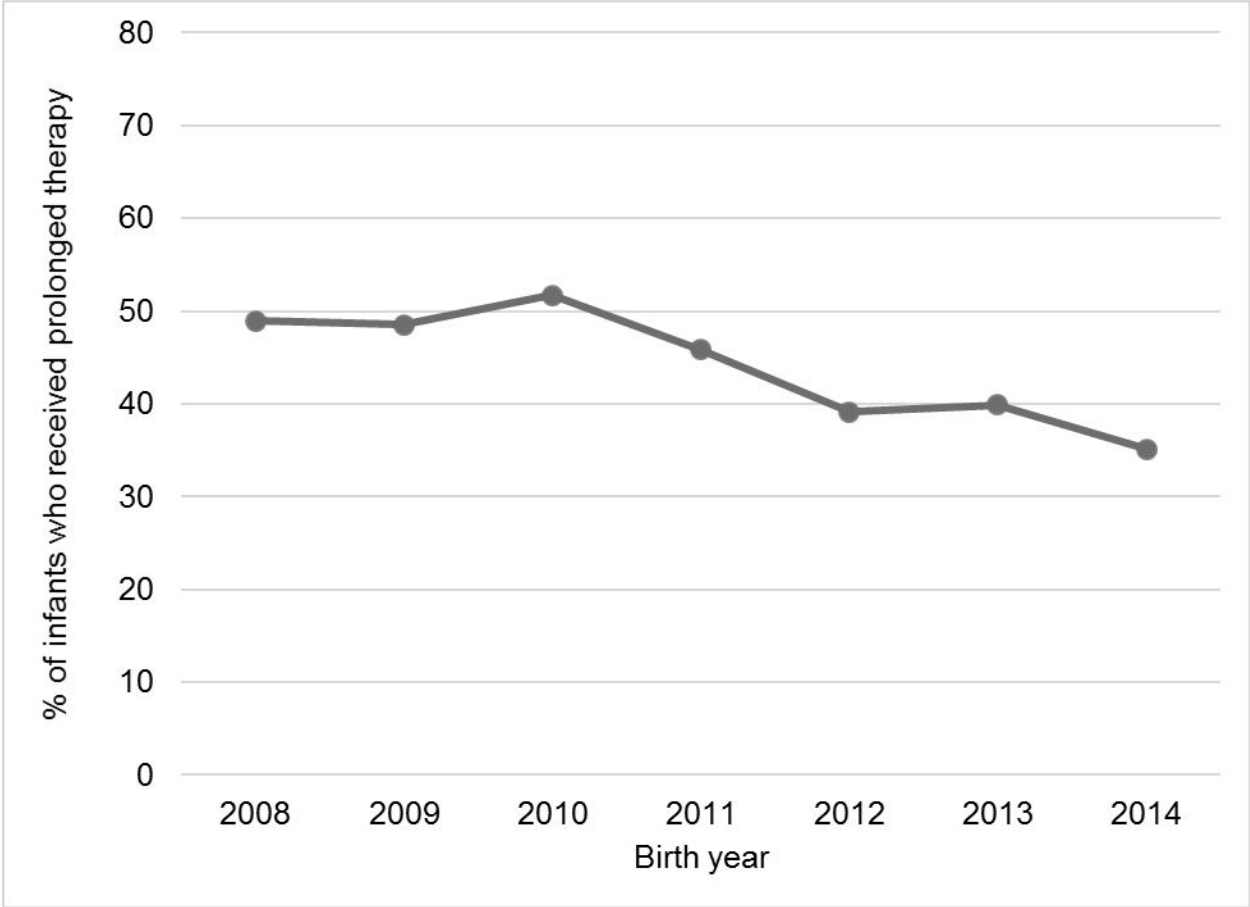

Supplement: NIHMS1518525-supplement-1.pdf [file NIHMS1518525-supplement-1.pdf]
